# Supplementary material for: Global Regulation of the Histone Mark H3K36me2 Underlies Epithelial Plasticity and Metastatic Progression
Source: Oxford University Press journal article supplement (doi:10.1158/2159-8290.cd-19-1299), 2020-03-18
Supplement: 21598290cd191299-sup-231819_2_supp_6150755_q6ztfk.docx [file 21598290cd191299-sup-231819_2_supp_6150755_q6ztfk.docx]

| **sgRNA** | **Forward** | **Reverse** |
| --- | --- | --- |
| Ecadherin.1 | CACCGCCAGTTTCCTCGTCCGCGCC | AAACGGCGCGGACGAGGAAACTGGC |
| Ecadherin.2 | CACCGCCGGGCGCGGACGAGGAAAC | AAACGTTTCCTCGTCCGCGCCCGGC |
| Ecadherin.3 | CACCGGCTGACGATGGTGTAGGCGA | AAACTCGCCTACACCATCGTCAGCC |
| Ecadherin.4 | CACCGCGCCTACACCATCGTCAGCC | AAACGGCTGACGATGGTGTAGGCGC |
| Ecadherin.5 | CACCGGGATCCCTCCAAGGATTCCG | AAACCGGAATCCTTGGAGGGATCCC |
| Ecadherin.6 | CACCGCTACGATTATCTGAACGAGT | AAACACTCGTTCAGATAATCGTAGC |
| Zeb1.1 | CACCGTTGTAGCCTCTATCACAATA | AAACTATTGTGATAGAGGCTACAAC |
| Zeb1.2 | CACCGATGCAAAGGTGTAACTGCAC | AAACGTGCAGTTACACCTTTGCATC |
| Zeb1.3 | CACCGTGTCATATGACGTTCAAGCT | AAACAGCTTGAACGTCATATGACAC |
| Zeb1.4 | CACCGATGTCATATGACGTTCAAGC | AAACGCTTGAACGTCATATGACATC |
| Zeb1.5 | CACCGTCCGTAAGTGCTCTTTCAGG | AAACCCTGAAAGAGCACTTACGGAC |
| Nsd2.1 | CACCGGCAGAGGCTGAACCTAAGC | AAACCGCTTAGGTTCAGCCTCTGCC |
| Nsd2.2 | CACCGCGTTGTGTGGTAAATCAGTG | AAACCACTGATTTACCACACAACGC |
| Kdm2a | CACCGACAGCATTGAAGATCGAACA | AAACTGTTCGATCTTCAATGCTGTC |
| NSD2.1 | CACCGACAACGTTGGTGATTTGGTG | AAACCACCAAATCACCAACGTTGTC |
| NSD2.2 | CACCGCGTTGGGGAGCTGATCGACG | AAACCGTCGATCAGCTCCCCAACGC |
| Yfp | CACCGGTAGCCGAAGGTGGTCACGA | AAACTCGTGACCACCTTCGGCTACC |

Supplementary Table S4. Oligos for sgRNAs.
