# Supplementary material for: Global Regulation of the Histone Mark H3K36me2 Underlies Epithelial Plasticity and Metastatic Progression
Source: Oxford University Press journal article supplement (doi:10.1158/2159-8290.cd-19-1299), 2020-03-18
Supplement: 21598290cd191299-sup-231819_2_supp_6150756_q6ztfs.docx [file 21598290cd191299-sup-231819_2_supp_6150756_q6ztfs.docx]

| **shRNA** | **Oligo Sequence** |
| --- | --- |
| shZeb1 #1 | TGCTGTTGACAGTGAGCGAACGTACTTTTAGTTTTAGAAATAGTGAAGCCACAGATGTATTTCTAAAACTAAAAGTACGTGTGCCTACTGCCTCGGA |
| shZeb1 #2 | TGCTGTTGACAGTGAGCGCCTGTAGTTTGTATTAATACAATAGTGAAGCCACAGATGTATTGTATTAATACAAACTACAGTTGCCTACTGCCTCGGA |
| shSnai1 #1 | TGCTGTTGACAGTGAGCGCAAGCAGCATTTTGTATAGTTATAGTGAAGCCACAGATGTATAACTATACAAAATGCTGCTTATGCCTACTGCCTCGGA |
| shSnai1 #2 | TGCTGTTGACAGTGAGCGCACAGTTTATTGATATTCAATATAGTGAAGCCACAGATGTATATTGAATATCAATAAACTGTATGCCTACTGCCTCGGA |
| shSnai2 #1 | TGCTGTTGACAGTGAGCGCCCTGGTCAAGAAACATTTCAATAGTGAAGCCACAGATGTATTGAAATGTTTCTTGACCAGGATGCCTACTGCCTCGGA |
| shSnai2 #2 | TGCTGTTGACAGTGAGCGAACCCACTCTGATGTAAAGAAATAGTGAAGCCACAGATGTATTTCTTTACATCAGAGTGGGTCTGCCTACTGCCTCGGA |
| shEcad #1 | TGCTGTTGACAGTGAGCGACCGGGACAATGTGTATTACTATAGTGAAGCCACAGATGTATAGTAATACACATTGTCCCGGGTGCCTACTGCCTCGGA |
| shEcad #2 | TGCTGTTGACAGTGAGCGCACCATGTTTGCTGTATTCTAATAGTGAAGCCACAGATGTATTAGAATACAGCAAACATGGTATGCCTACTGCCTCGGA |
| shGata6 #1 | TGCTGTTGACAGTGAGCGATCCTACTTCCTCTTCTTCTAATAGTGAAGCCACAGATGTATTAGAAGAAGAGGAAGTAGGAGTGCCTACTGCCTCGGA |
| shGata6 #2 | TGCTGTTGACAGTGAGCGCAACCAGGAAACGAAAACCTAATAGTGAAGCCACAGATGTATTAGGTTTTCGTTTCCTGGTTTTGCCTACTGCCTCGGA |
| shKlf5 #1 | TGCTGTTGACAGTGAGCGACACCTGTCAGATACAACAGAATAGTGAAGCCACAGATGTATTCTGTTGTATCTGACAGGTGGTGCCTACTGCCTCGGA |
| shKlf5 #2 | TGCTGTTGACAGTGAGCGAGTGAACAATATCTTCATCAAATAGTGAAGCCACAGATGTATTTGATGAAGATATTGTTCACCTGCCTACTGCCTCGGA |
| shElf5 #1 | TGCTGTTGACAGTGAGCGACCCTGAGATACTACTATAAAATAGTGAAGCCACAGATGTATTTTATAGTAGTATCTCAGGGCTGCCTACTGCCTCGGA |
| shElf5 #2 | TGCTGTTGACAGTGAGCGAGAGCCCTGAGATACTACTATATAGTGAAGCCACAGATGTATATAGTAGTATCTCAGGGCTCGTGCCTACTGCCTCGGA |

Supplementary Table S5. Oligos for shRNAs.
