# Supplementary material for: Global Regulation of the Histone Mark H3K36me2 Underlies Epithelial Plasticity and Metastatic Progression
Source: Oxford University Press journal article supplement (doi:10.1158/2159-8290.cd-19-1299), 2020-03-18
Supplement: 21598290cd191299-sup-231819_2_supp_6150758_q6ztfc.docx [file 21598290cd191299-sup-231819_2_supp_6150758_q6ztfc.docx]

Murine

| **Gene** | **Forward** | **Reverse** |
| --- | --- | --- |
| *Ecad* | CTCCAGTCATAGGGAGCTGTC | TCTTCTGAGACCTGGGTACAC |
| *Ocln* | CTGTGATGTGTGTTGAGCTTTG | GGCTGCTGCAAAGATTGATTAG |
| *Cldn12* | CCTGCTGTTCGTTTGGTATTG | TGATGAATAGGGCTGTGAGTAAG |
| *Zeb1* | CTTACGGATTCACAGTGGAGAG | GTGAGCTATAGGAGCCAGAATG |
| *Snai1* | GTCTCAGAAGGGACCATGAATAA | ATAGTTCTGGGAGACACATTGG |
| *Snai2* | GCAGACCCACTCTGATGTAAAG | CAGCCAGACTCCTCATGTTTAT |
| *Twist1* | CTAGAGACTCTGGAGCTGGATAA | CGCCCTGATTCTTGTGAATTTG |
| *Gata6* | CTTACACTCACAGCCCACTTC | GGGACTGTGTTGGTGTTCTT |
| *Klf5* | CCGCTACAATTGCTTCCAAAC | CGGGTTACTCCTTCTGTTGTATC |
| *Elf5* | CGTCAGCGTGTTCAGTTTATTG | GGACGTTCTCTGCTTGGTAAA |
| *Epcam* | GCGGCTCAGAGAGACTGTG | CCAAGCATTTAGACGCCAGTTT |
| *Fn1* | TCCTGTCTACCTCACAGACTAC | GTCTACTCCACCGAACAACAA |
| *Vim* | CCCTGAACCTGAGAGAAACTAAC | CTCTGGTCTCAACCGTCTTAATC |
| *Ncad* | AGTGGCAGGTAGCTGTAAAC | TGGCAAGTTGTCTAGGGAATAC |
| *Nsd2* | CAATGTGAGCTGGTGCTTTG | ATCGGGCATCTCGATGTTTAG |
| *Nsd1* | TCGCTCGGGAAATGGTATTG | CGTTTCCGTTTCCTTGGTTTATC |
| *Nsd3* | CGGCATACTAGCTTGGAAGAG | ATTGTGATGGAGGCTGGTAAG |
| *Kdm2a* | TCAGTCCAACCTACTAACT | CAGGGTCTGGTCTGTCAATTT |
| *Kdm2b* | CTACCAAGTGGACTCACCTTAC | CCTCAGGGACACACTTCTTCTT |
| *Col1a1* | AGACCTGTGTGTTCCCTACT | GAATCCATCGGTCATGCTCTC |
| *Foxa1* | ATGAGAGCAACGACTGGAACA | TCATGGAGTTCATAGAGCCCA |
| *Hnf1a* | GACCTGACCGAGTTGCCTAAT | CCGGCTCTTTCAGAATGGGT |
| *Hnf4a* | CACGCGGAGGTCAAGCTAC | CCCAGAGATGGGAGAGGTGAT |
| *Pdgfrb* | GACGGTGGCTACATGGATATG | GGGACTCAATGTCTGCGTATT |
| *Fsp1* | AACCTCTCTATTCAGCACTTCC | TGTGGAAGGTGGACACAATTA |
| *Tbp* | AGAACAATCCAGACTAGCAGCA | GGGAACTTCACATCACAGCTC |

Human

| **Gene** | **Forward** | **Reverse** |
| --- | --- | --- |
| *ECAD* | CTCCCTTCACAGCAGAACTAAC | CCACCTCTAAGGCCATCTTTG |
| *OCLN* | GGTTCACTTCTCCCAGTCTTTC | AGACACAATCAACAGGGTTAGG |
| *ZEB1* | CCCATCACCTCTAAACCTTTCC | GGTTCTACTTGTGGCTCTTCTT |
| *SNAI1* | ACTATGCCGCGCTCTTTC | GCTGGAAGGTAAACTCTGGATTA |
| *SNAI2* | GCGATGCCCAGTCTAGAAA | GGTAATGTGTGGGTCCGAATA |
| *VIM* | CAGCTTTCAAGTGCCTTTCTG | CTTGTAGGAGTGTCGGTTGTT |
| *EPCAM* | GGTGATGAAGGCAGAAATGAATG | TCATCGCAGTCAGGATCATAAAG |
| *FN1* | CCACAGTGGAGTATGTGGTTAG | CAGTCCTTTAGGGCGATCAAT |
| *ZO1* | GCAGCCACAACCAATTCATAG | GAAAGGTAAGGGACTGGAGATG |
| *FOXA1* | CCGTTCTCCATCAACAACCT | TAGAGCCGTAAGGCGAGTAT |
| *HNF1A* | GACCTCCAGCTTTCCTGTATTT | CGAAGTAGCCTTCCCAGTAGA |
| *HNF4A* | GGAGAGGACAAGATGGGTAAAC | TAAGACAGTGCCTGGGAGTA |
| *NCAD* | GAGGGCACATGCAGTAGATATT | AACTCAGGTCTGTTGTCATTCA |
| *PDGFRB* | GCTCACCATCATCTCCCTTATC | CTCACAGACTCAATCACCTTCC |
| *COL1A1* | CCTGTCTGCTTCCTGTAAACTC | GTTCAGTTTGGGTTGCTTGTC |
| *NSD2* | TAAGCGCTGTGTGGTAACTC | GGAAACCTCGGCTCTCAAATA |
| *TBP* | CCACTCACAGACTCTCACAAC | CTGCGGTACAATCCCAGAACT |

**Supplementary Table S7. Primers used for RT-qPCR.**
