# Supplementary material for: Global Regulation of the Histone Mark H3K36me2 Underlies Epithelial Plasticity and Metastatic Progression
Source: Oxford University Press journal article supplement (doi:10.1158/2159-8290.cd-19-1299), 2020-03-18
Supplement: 21598290cd191299-sup-231819_2_supp_6150759_q6ztf2.docx [file 21598290cd191299-sup-231819_2_supp_6150759_q6ztf2.docx]

| Sample | Primer | Sequence |
| --- | --- | --- |
| All | Ad1_noMX | AATGATACGGCGACCACCGAGATCTACACTCGTCGGCAGCGTCAGATGTG |
| 7591 c3 Ecad+ | Ad2.2 | CAAGCAGAAGACGGCATACGAGAT**CTAGTACG**GTCTCGTGGGCTCGGAGATGT |
| 7591 c3 Ecad- | Ad2.3 | CAAGCAGAAGACGGCATACGAGAT**TTCTGCCT**GTCTCGTGGGCTCGGAGATGT |
| 3077 c4 Ecad+ | Ad2.4 | CAAGCAGAAGACGGCATACGAGAT**GCTCAGGA**GTCTCGTGGGCTCGGAGATGT |
| 3077 c4 Ecad- | Ad2.5 | CAAGCAGAAGACGGCATACGAGAT**AGGAGTCC**GTCTCGTGGGCTCGGAGATGT |
| 483 c6 Ecad+ | Ad2.12 | CAAGCAGAAGACGGCATACGAGAT**TCCTCTAC**GTCTCGTGGGCTCGGAGATGT |
| 483 c6 Ecad- | Ad2.13 | CAAGCAGAAGACGGCATACGAGAT**ATCACGAC**GTCTCGTGGGCTCGGAGATGT |
| 3077 c8 Ecad+ | Ad2.16 | CAAGCAGAAGACGGCATACGAGAT**ACAAACGG**GTCTCGTGGGCTCGGAGATGT |
| 3077 c8 Ecad- | Ad2.17 | CAAGCAGAAGACGGCATACGAGAT**ACCCAGCA**GTCTCGTGGGCTCGGAGATGT |

Note: bold = barcode; sequences from (Buenrostro et al., 2013).

**Supplementary Table S8. Primers used for ATAC-seq libraries.**
